# Supplementary material for: Oncogenic ASPM Is a Regulatory Hub of Developmental and Stemness Signaling in Cancers
Source: PubMed Central journal article supplement — Cancer Res. 2023 Jun 29;83(18):2993–3000. doi: 10.1158/0008-5472.CAN-23-0158 (PMC10502471; doi:10.1158/0008-5472.can-23-0158), 2023-06-29
Supplement: can-23-0158_supplementary_data_suppsf1-sf5_st1-st2_smm.pdf [file can-23-0158_supplementary_data_suppsf1-sf5_st1-st2_smm.pdf]

## Supplementary Figure S1

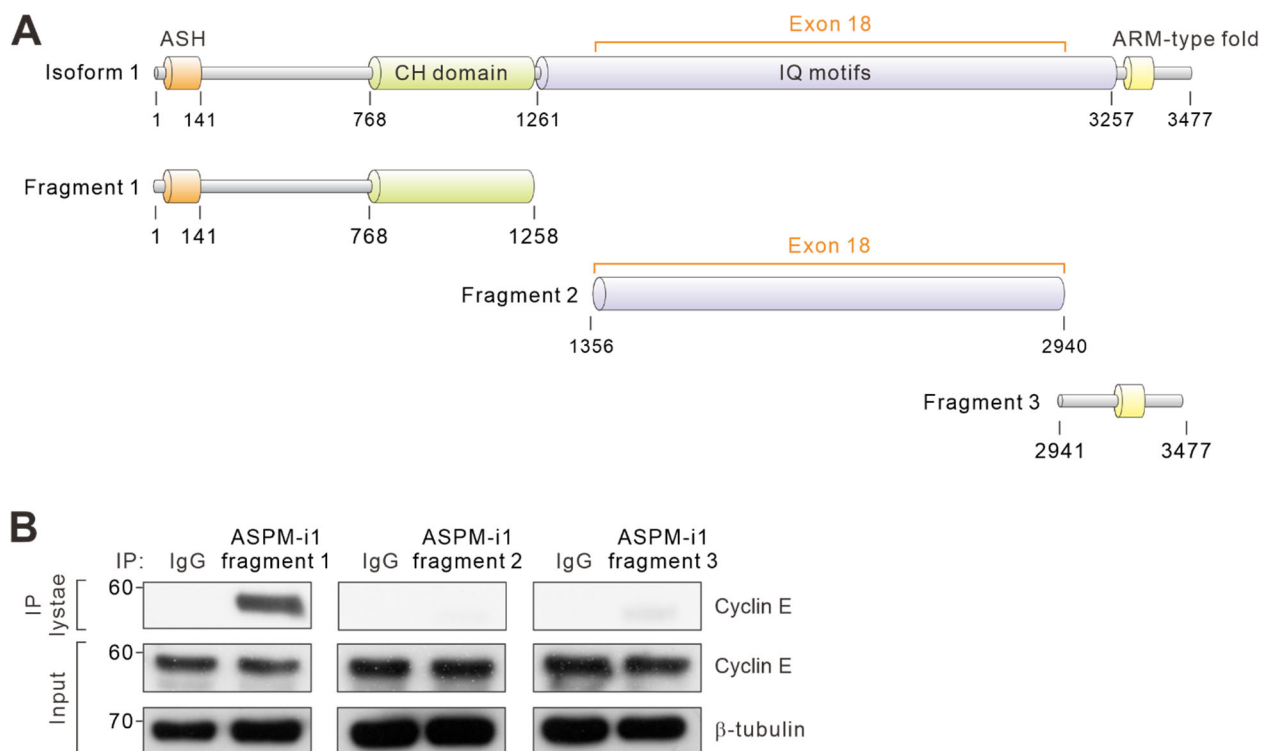

**Supplementary Figure 1. ASPM isoform 1 interacts with cyclin E through the amino-terminal region.** **A**, Schematics representing the different ASPM isoform 1 (ASPM-i1) protein segments, including the amino-terminal region (fragment 1; amino acids 1-1258), the exon-18-encoded segment (fragment 2; amino acids 1356-2940), and the carboxy-terminal region (fragment 3; amino acids 2941-3477). **B**, Representative co-immunoprecipitation (IP) analyses demonstrating that ASPM-i1 interacts with cyclin E through the amino-terminal region (*i.e.*, fragment 1 in **A**) in MDA-MB-436 cancer cells.  $\beta$ -tubulin was included as a loading control. Note that the exon-18-encoded segment (*i.e.*, fragment 2) or the carboxy-terminal region of ASPM-i1 (*i.e.*, fragment 3) does not interact with cyclin E.

## Supplementary Figure S2

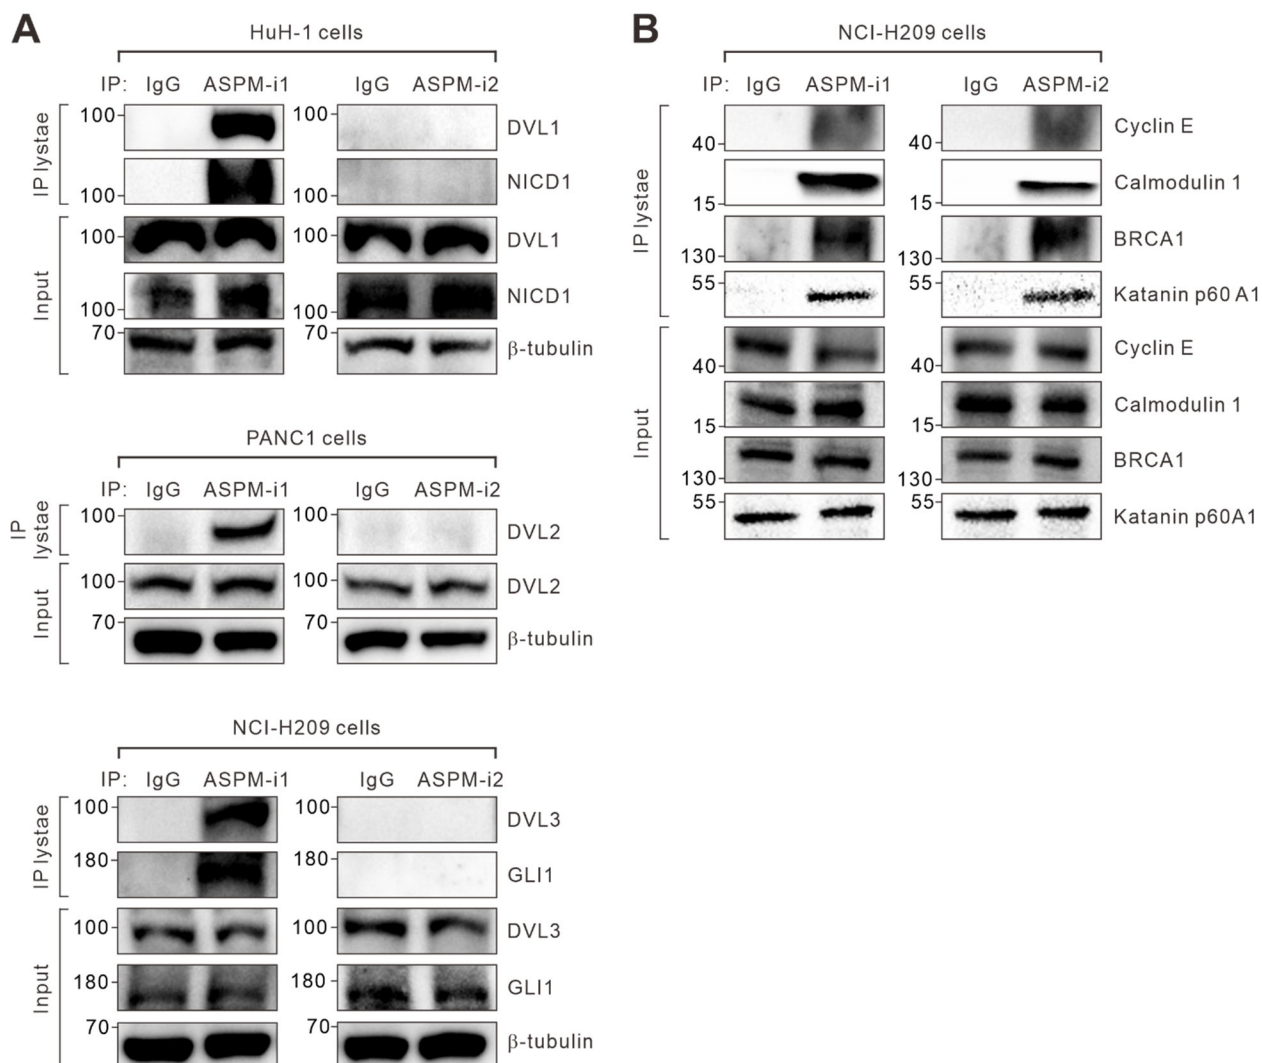

**Supplementary Figure 2. The binding partners of ASPM isoforms 1 and 2 in cancer cells.** **A**, Representative co-immunoprecipitation (IP) analyses demonstrating that endogenous ASPM isoform 1 (ASPM-i1), but not ASPM isoform 2 (ASPM-i2), associates with DVL proteins, including DVL1, DVL2, and DVL3, and GLI1 and NOTCH1 Intracellular Domain (NICD1) in HuH-1 (hepatocellular carcinoma), PANC1 (pancreatic ductal adenocarcinoma), or NCI-H209 (small cell lung cancer) cells.  $\beta$ -tubulin was included as loading controls. **B**, Representative co-IP analyses demonstrating that both endogenous ASPM-i1 and ASPM-i2 associate with cyclin E (involved in the cell cycle), calmodulin 1 (involved in calcium signal transduction), BRCA1 (involved in DNA damage repair), and katanin (involved in mitosis) in NCI-H209 cancer cells.

### Supplementary Figure S3

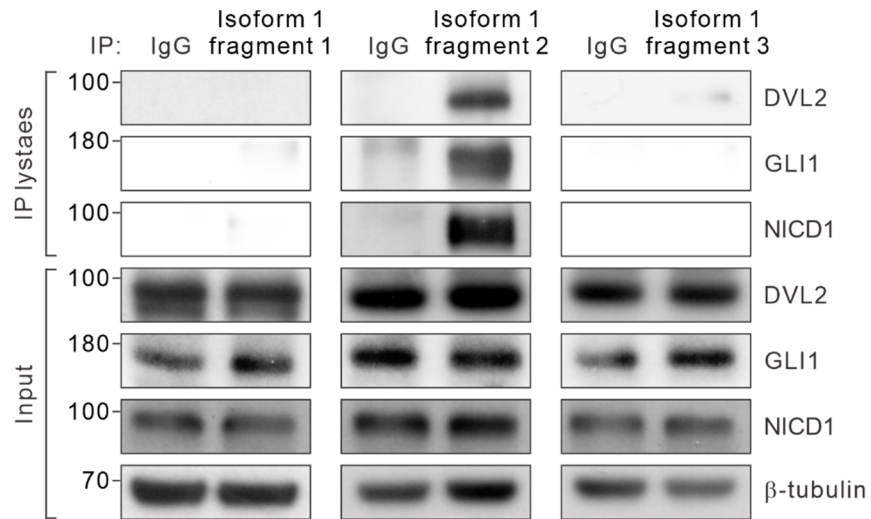

**Supplementary Figure 3. ASPM isoform 1 interacts with DVL2, GLI1, and NOTCH1 Intracellular Domain (NICD1) through its exon-18-encoded segment.** Shown are representative co-immunoprecipitation (IP) analyses demonstrating that the exon-18-encoded region (*i.e.*, fragment 2 in Supplementary Fig. S1A) of ASPM-i1 specifically interacts with DVL2, GLI1, and NICD1 in MDA-MB-436 cancer cells.  $\beta$ -tubulin was included as a loading control.

## Supplementary Figure S4

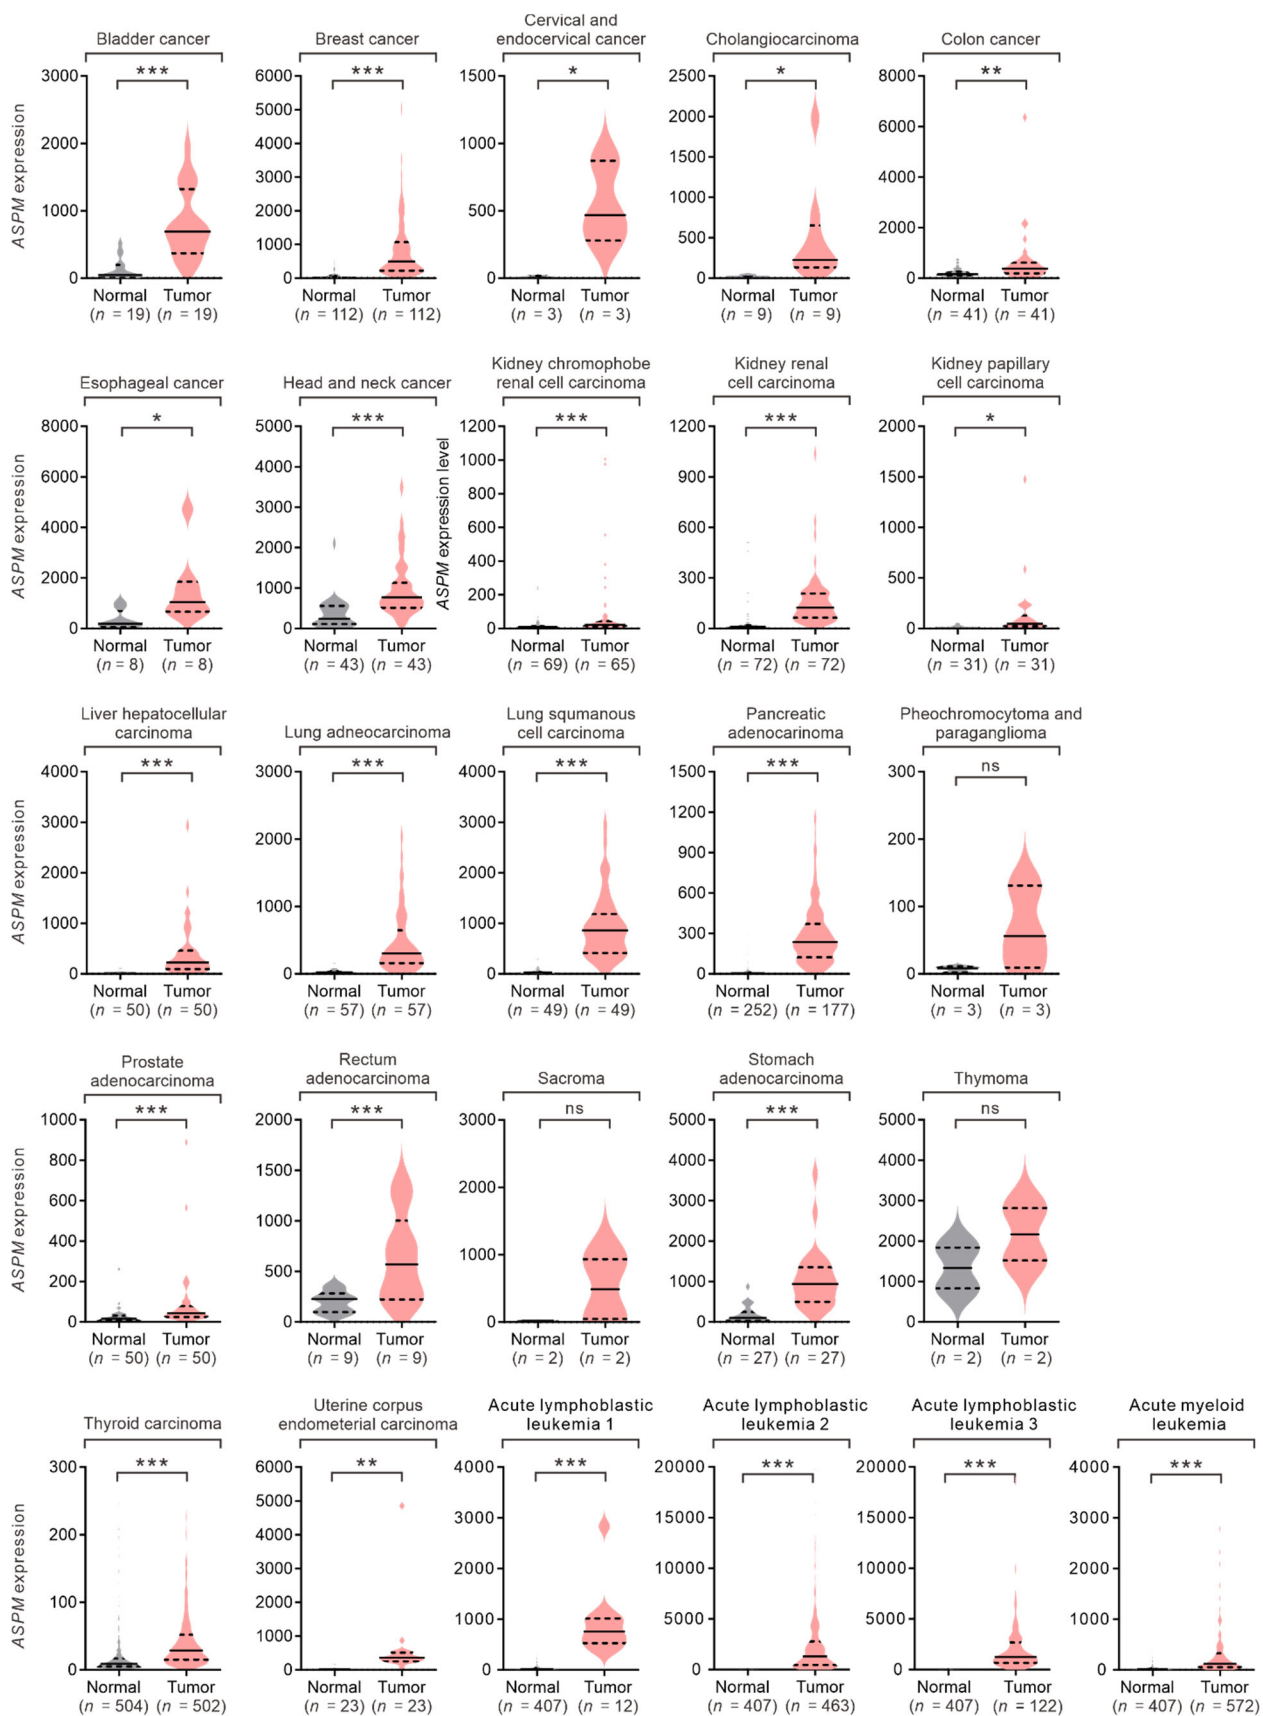

**Supplementary Figure 4. *ASPM* is overexpressed in most human solid tumors and leukemia.** Shown are violin plots demonstrating the expression level of *ASPM* in normal and cancer tissues based on the RNA sequencing data downloaded from TNMplot (<https://tnmplot.com/analysis/>). Data represent paired normal and tumor tissues except acute lymphoblastic leukemia, acute myeloid leukemia, kidney chromophobe renal cell carcinoma, pancreatic adenocarcinoma, and thyroid carcinoma, in which the expression level of *ASPM* in normal tissues was included. Solid bar, mean. Dashed bar, first and third quartile cutoff values. ns, not significant, \* $P < 0.05$ ; \*\* $P < 0.01$ ; \*\*\* $P < 0.001$ , two-tailed unpaired *t*-test

## Supplementary Figure S5

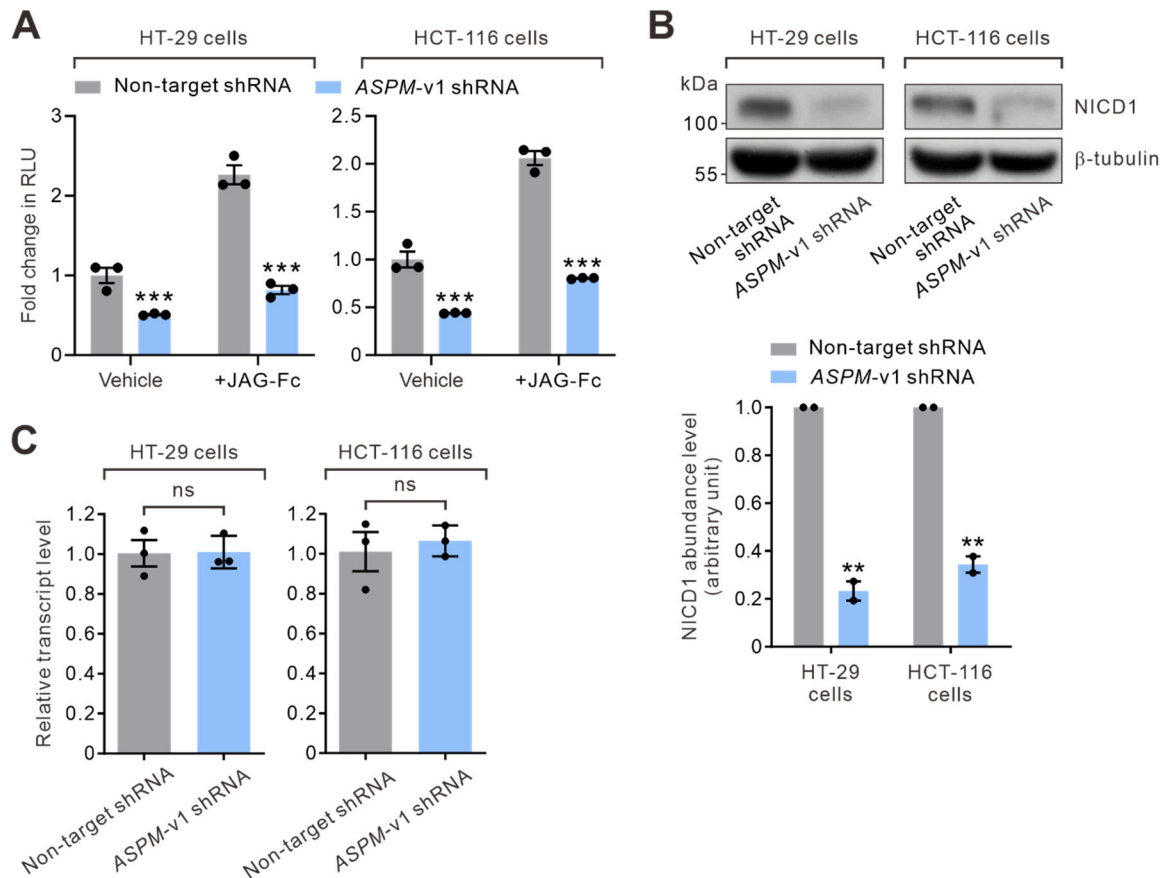

**Supplementary Figure 5. ASPM isoform 1 regulates the Notch pathway activity and the protein abundance level of NOTCH1 Intracellular Domain (NICD1) in cancer cells.** **A**, Relative Notch-specific luciferase activity (relative light unit; RLU) in HT-29 and HCT-116 cancer cells without (non-target) or with small hairpin RNA (shRNA)-mediated knockdown of *ASPM* variant 1 (*ASPM*-v1; encoding *ASPM* isoform 1) expression and stimulated with the activating Notch ligand JAG1-Fc (5  $\mu$ g/ml for 24 hours).  $n = 3$  independent experiments. **B**, Immunoblotting analysis showing the protein abundance level of NICD1 in HT-29 or HCT-116 cells without (non-target) or with shRNA-mediated knockdown of *ASPM*-v1 expression (left). The arbitrary densitometry unit of the immunoblots is shown at the bottom.  $\beta$ -tubulin was included as a loading control.  $n = 2$  independent experiments. **C**, The transcript level of *NOTCH1* in HCT-116 and HT-29 cells with shRNA-mediated knockdown of *ASPM*-v1 expression as measured by qRT-PCR.  $n = 3$  independent experiments. The lentivirus shRNA construct #4 used to knock down *ASPM*-v1 expression was described previously (1). The knockdown of *ASPM*-v1 expression did not significantly affect the transcript level of *NOTCH1*. Data represent

mean  $\pm$  SEM. ns, not significant,  $**P < 0.01$ ;  $***P < 0.001$  compared with non-target shRNA; two-tailed unpaired *t*-test.

**Supplementary Table 1. The expression pattern of ASPM and its prognostic significance in cancers**

| Cancer type             | Gene/<br>protein             | Assay        | Expression level<br>compared with<br>normal tissue | Correlation with clinical<br>variables                               | Prognostic<br>correlation | References |
|-------------------------|------------------------------|--------------|----------------------------------------------------|----------------------------------------------------------------------|---------------------------|------------|
| Bladder cancer          | <i>ASPM</i>                  | GEP, RNA-seq | Elevated                                           | Tumor size, grade, node<br>status, TNM stage                         | OS, PFS                   | (2)        |
|                         | <i>ASPM</i>                  | qRT-PCR      | Elevated                                           | Muscle invasion, tumor<br>grade, size, clinical stage,<br>metastasis | OS, PFS                   | (3)        |
|                         | <i>ASPM</i>                  | GEP, qRT-PCR | Elevated                                           |                                                                      | OS                        | (4)        |
| Breast cancer           | <i>ASPM</i> /<br><i>ASPM</i> | GEP, IHC     | Elevated                                           | Tumor size, grade, clinical<br>stage                                 | OS, RFS                   | (5)        |
| Cholangio-<br>carcinoma | <i>ASPM</i>                  | RNA-seq      | Elevated                                           |                                                                      |                           | (6)        |
| CRC                     | <i>ASPM</i>                  | IHC          | Elevated                                           | Clinical stage, lymph node<br>metastasis                             |                           | (7)        |
| DLBCL                   | <i>ASPM</i>                  | IHC          | Elevated                                           |                                                                      | OS                        | (8)        |
| Esophageal<br>cancer    | <i>ASPM</i>                  | RNA-seq, GEP | Elevated                                           |                                                                      |                           | (9)        |
| Gastric cancer          | <i>ASPM</i> /<br><i>ASPM</i> | GEP, IHC     | Elevated                                           |                                                                      |                           | (10)       |
|                         | <i>ASPM-i1</i>               | IHC          | Elevated                                           |                                                                      | OS                        | (11)       |



|                                    |                             |                          |          |                                                                                               |         |      |
|------------------------------------|-----------------------------|--------------------------|----------|-----------------------------------------------------------------------------------------------|---------|------|
| Glioblastoma                       | <i>ASPM</i>                 | qRT-PCR                  | Elevated | Tumor grade, recurrence                                                                       |         | (12) |
| HCC                                | <i>ASPM</i>                 | RT-PCR                   | Elevated | AFP, tumor grade, stage,<br>early tumor recurrence                                            | OS      | (13) |
|                                    | <i>ASPM</i>                 | GEP                      | Elevated | Disease progression from<br>cirrhosis to HCC                                                  |         | (14) |
|                                    | <i>ASPM</i>                 | RNA-seq                  | Elevated |                                                                                               | OS, RFS | (15) |
|                                    | <i>ASPM</i>                 | IHC                      |          |                                                                                               | OS      | (16) |
| Lung<br>squamous cell<br>carcinoma | <i>ASPM</i>                 | IHC                      | Elevated | Tumor size, clinical stage                                                                    | OS, PFS | (17) |
| Lung<br>adenocarcino<br>ma         | <i>ASPM/</i><br><i>ASPM</i> | RNA-seq, GEP,<br>IHC, IB | Elevated | Pathological tumor status,<br>lymph node status,<br>differentiation status,<br>clinical stage | OS, PFS | (18) |
| Osteosarcoma                       | <i>ASPM</i>                 | IHC                      | Elevated | Tumor size, clinical stage                                                                    |         | (19) |
| Ovarian<br>cancer                  | <i>ASPM</i>                 | qRT-PCR                  | Elevated |                                                                                               |         | (20) |
|                                    | <i>ASPM</i>                 | IHC                      | Elevated | Tumor grade, clinical<br>stage                                                                | OS, PFS | (21) |
| PDAC                               | <i>ASPM/</i><br><i>ASPM</i> | GEP, IHC                 | Elevated |                                                                                               | OS      | (22) |
|                                    | <i>ASPM</i>                 | GEP                      | Elevated | Tumor grade                                                                                   |         | (23) |

|                 |                             |          |          |                                                                                        |                                                   |      |
|-----------------|-----------------------------|----------|----------|----------------------------------------------------------------------------------------|---------------------------------------------------|------|
|                 | ASPM-i1                     | IHC      | Elevated |                                                                                        | OS                                                | (24) |
| Prostate cancer | <i>ASPM</i> /<br>ASPM       | GEP, IHC | Elevated | Gleason score, PSA, clinical stage, tumor grade                                        | OS,<br>Biochemical (PSA) recurrence-free survival | (25) |
|                 | ASPM                        | IHC      | Elevated | Seminal vesicle invasion, Gleason score, cribriform and intraductal carcinoma patterns | RFS                                               | (26) |
| SCLC            | <i>ASPM-v1</i> /<br>ASPM-i1 | GEP, IHC | Elevated |                                                                                        | OS                                                | (1)  |
| Uterine cancers | <i>ASPM</i>                 | qRT-PCR  | Elevated |                                                                                        |                                                   | (20) |

---

ASPM-i1, ASPM isoform 1; *ASPM-v1*, *ASPM* variant 1; CRC, colorectal cancer; DLBCL, diffuse large B-cell lymphoma; GEP, gene-expression profiling by microarray; HCC, hepatocellular carcinoma; IB, immunoblotting; IHC, immunohistochemistry; OS, overall survival; PDAC, pancreatic ductal-adenocarcinoma; PFS, progression-free survival; PSA, prostate specific antigen; qRT-PCR, quantitative reverse transcription polymerase chain reaction; RFS, relapse-free survival; RNA-seq, RNA sequencing; SCLC, small cell lung cancer.

**Supplementary Table 2. Functional studies implicating the oncogenic role of ASPM**

| Cancer type    | Gene           | Approach                     | Type of study                       | Findings                                                                                              | References |
|----------------|----------------|------------------------------|-------------------------------------|-------------------------------------------------------------------------------------------------------|------------|
| CRC            | <i>ASPM</i>    | shRNA-mediated KD            | <i>In vitro</i> ;<br><i>in vivo</i> | Reduced migration and invasion of cancer cells; reduced pulmonary metastasis                          | (27)       |
| Gastric cancer | <i>ASPM-v1</i> | shRNA-mediated KD            | <i>In vitro</i>                     | Reduced tumorsphere formation                                                                         | (11)       |
| Glioblastoma   | <i>ASPM</i>    | siRNA- and shRNA-mediated KD | <i>In vitro</i> ;<br><i>in vivo</i> | G0/G1 cell cycle arrest and reduced proliferation of cancer cells; reduced growth of xenograft tumors | (28)       |
|                | <i>ASPM</i>    | shRNA-mediated KD            | <i>In vitro</i>                     | Increased cell death; reduced cell proliferation and secondary sphere formation                       | (12)       |
|                | <i>ASPM</i>    | siRNA-mediated KD            | <i>In vitro</i>                     | Reduced proliferation and secondary sphere formation                                                  | (29)       |
| HCC            | <i>ASPM</i>    | shRNA-mediated KD            | <i>In vitro</i> ;<br><i>in vivo</i> | Reduced proliferation of cancer cells; reduced growth of xenograft tumors                             | (30)       |
|                | <i>ASPM</i>    | shRNA-mediated KD            | <i>In vivo</i>                      | Reduced frequency of tumor-initiating cells; reduced growth of xenograft tumors                       | (16)       |
|                | <i>ASPM</i>    | siRNA-mediated KD            | <i>In vitro</i>                     | Reduced proliferation, migration and invasion of cancer cells                                         | (15)       |

|                 |                |                                              |                                     |                                                                                                                       |      |
|-----------------|----------------|----------------------------------------------|-------------------------------------|-----------------------------------------------------------------------------------------------------------------------|------|
|                 | <i>ASPM</i>    | shRNA-mediated KD                            | <i>In vitro</i> ;<br><i>in vivo</i> | Reduced proliferation, migration and invasion of cancer cells; reduced growth of xenograft tumors                     | (31) |
| NSCLC           | <i>ASPM</i>    | siRNA- and shRNA-mediated KD                 | <i>In vitro</i> ;<br><i>in vivo</i> | Reduced proliferation, migration and invasion of cancer cells; reduced growth of xenograft tumors                     | (18) |
|                 | <i>ASPM</i>    | siRNA-mediated KD;<br>lentivirus-mediated OE | <i>In vitro</i>                     | Reduced invasion of cancer cells (KD);<br>enhanced invasion of cancer cells (OE)                                      | (32) |
| Osteosarcoma    | <i>ASPM</i>    | shRNA-mediated KD                            | <i>In vitro</i> ;<br><i>in vivo</i> | Reduced proliferation of cancer cells;<br>reduced growth of xenograft tumors                                          | (19) |
| Ovarian cancer  | <i>ASPM</i>    | siRNA-mediated KD                            | <i>In vitro</i>                     | Reduced proliferation and migration of cancer cells                                                                   | (21) |
| PDAC            | <i>ASPM</i>    | shRNA-mediated KD                            | <i>In vitro</i> ;<br><i>in vivo</i> | Reduced proliferation and migration of cancer cells; reduced growth of xenograft tumors                               | (22) |
|                 | <i>ASPM-v1</i> | shRNA-mediated KD                            | <i>In vitro</i>                     | Reduced tumorsphere formation                                                                                         | (24) |
| Prostate cancer | <i>ASPM</i>    | shRNA-mediated KD                            | <i>In vitro</i> ;<br><i>in vivo</i> | Reduced proliferation and invasion of cancer cells; reduced tumorsphere formation; reduced growth of xenograft tumors | (26) |
| SCLC            | <i>ASPM-v1</i> | shRNA-mediated KD                            | <i>In vitro</i> ;<br><i>in vivo</i> | Reduced proliferation and invasion of cancer cells; reduced tumorsphere                                               | (1)  |

formation; reduced growth of xenograft tumors

|                   |             |                         |                                     |                                                                                    |      |
|-------------------|-------------|-------------------------|-------------------------------------|------------------------------------------------------------------------------------|------|
| Thyroid carcinoma | <i>ASPM</i> | CRISPR/Cas9-mediated KO | <i>In vitro</i> ;<br><i>in vivo</i> | Reduced migration and invasion of cancer cells; reduced growth of xenograft tumors | (33) |
|-------------------|-------------|-------------------------|-------------------------------------|------------------------------------------------------------------------------------|------|

---

*ASPM-v1*, *ASPM* variant 1; CRC, colorectal cancer; HCC, hepatocellular carcinoma; KD, knockdown; KO, knockout; NSCLC, non-small cell lung cancer; OE, overexpression; PDAC, pancreatic ductal adenocarcinoma; SCLC, small cell lung cancer; shRNA, short hairpin RNA; siRNA, small interfering RNA.

## **SUPPLEMENTARY MATERIALS AND METHODS**

### **Cell culture**

PANC-1, MDA-MB-436 (American Type Culture Collection; RRID:CVCL\_0480 and RRID:CVCL\_0623), and HuH-1 cells (Japanese Collection of Research Bioresources; RRID:CVCL\_2956) were maintained in DMEM (Invitrogen) supplemented with 10% fetal bovine serum and antibiotics. NCI-H209 cells (American Type Culture Collection; RRID:CVCL\_1525) were maintained in HITES medium consisting of DMEM:F12 medium (Invitrogen), 5% fetal bovine serum, 0.005 mg/ml insulin, 0.01 mg/ml transferrin, 30 nM sodium selenite, 10 nM hydrocortisone, 10 nM  $\beta$ -estradiol, and 2 mM L-glutamine. HT-29 and HCT-116 (American Type Culture Collection; RRID:CVCL\_0320 and RRID:CVCL\_AS10) were maintained in McCoy's 5a (Invitrogen) supplemented with 10% fetal bovine serum and antibiotics.

### **Immunoblot (IB) and co-immunoprecipitation (IP)**

IB analysis and co-IP experiments were performed according to standard protocols. Antibodies used for IB experiments include anti-dishevelled (DVL)-1 (Santa Cruz; 3F12, RRID:AB\_627430), anti-DVL2 (RRID: AB\_2093330), anti-DVL3 (Proteintech, RRID:AB\_2093451), anti-cyclin E (Merck, HE12, RRID: AB\_2071085), anti-GLI1 (GeneTex; HL247, RRID: AB\_2888543), anti-BRCA1 (GeneTex, RRID: AB\_2888543), anti-katanin p60 A1 (Proteintech, RRID: AB\_10694670), and anti-cleaved Notch1 (NICD1) (Cell signaling, D3B8, RRID: AB\_2153348). The rabbit polyclonal antibodies specifically detecting ASPM isoform 1 (ASPM-i1; NCBI RefSeq: NP\_060606.3) or isoform 2 (ASPM-i2; NCBI RefSeq: NP\_001193775.1) were described previously (24). A goat anti-rabbit IgG (Jackson ImmunoResearch, RRID:AB\_2337913) was used in conjunction with the polyclonal antibodies raised for the immune detection of the ASPM isoforms as described above. Proteins were revealed after SDS/PAGE and immunoblotting with the indicated antibodies. IB protein analysis was performed according to standard protocols. For co-IP, cells were lysed by non-denaturing lysis buffer (1 mM PMSF, 1mM Na<sub>3</sub>VO<sub>4</sub>, 1  $\mu$ g/ml Pepstatin, 20 mM NaF, phosphatase inhibitor cocktail, 0.5% NP-40 and 10% Glycerol in PBS) and the 1mg lysates were cleared by incubation with 50% protein A-Sepharose bead slurry, after which 1 mL of the cleared lysates were incubated with antibody-conjugated 50% protein A-Sepharose beads and 10  $\mu$ L of 10% BSA overnight at 4°C. The beads were washed three times with washing buffer (0.5% NP-40, 0.1% Triton X-

100, 1 mM PMSF, and 1 mM Na<sub>3</sub>VO<sub>4</sub> in PBS). Proteins were revealed after SDS/PAGE and immunoblotting with the indicated antibodies.

### **Gene expression manipulations**

The DNA constructs encoding the amino-terminal region of ASPM-i1 (a.a. 1-1258; fragment 1 in Supplementary Fig. 1A), the protein segment encoded by exon 18 of *ASPM* (a.a. 1356-2940; fragment 2 in Supplementary Fig. 1A), and the carboxy-terminal region (a.a. 2941-3477; fragment 3 in Supplementary Fig. 1A) were PCR-amplified from the full-length human *ASPM* variant 1 (*ASPM-v1*) expression construct pCMV6-Entry-ASPM-Myc-DDK (Origene, RC214770). The amplicons were then subcloned into a V5 epitope- and polyhistidine-tagged expression vector pcDNA 3.1/V5-His A (Invitrogen). The vectors were transduced into cancer cells using the Lipofectamine LTX transfection reagent (Invitrogen). The specific knockdown of *ASPM-v1* expression, which encodes ASPM-i1, was carried out by lentivirus-mediated transduction of shRNA target sequences specific for the exon 18 of the *ASPM* gene (unique to *ASPM-v1*), as described previously (24). The lentiviral vector encoding a non-target shRNA (MISSION<sup>®</sup> pLKO.1-puro Non-Mammalian shRNA; SHC002V; Sigma-Aldrich) was used as a control.

### **Luciferase reporter assay**

HT-29 and HCT-116 cells were lentivirally transduced with the lentiviral triple Wnt/Hh/Notch pathway reporter pMuLE\_EXPR\_CMV-eGFP\_TOP-NLuc1.1\_12GLI-FLuc\_CBF-GLuc (Addgene plasmid #113862, RRID:Addgene\_113862) and then stimulated with recombinant human JAG1-Fc (5 µg/ml for 24 hours; Sigma-Aldrich) or vehicle (34). The Notch reporter activity of the cells was measured using the ONE-Glo<sup>®</sup> Luciferase Assay System (Promega).

### **Quantitative reverse transcription-polymerase chain reaction (qRT-PCR) analysis**

qRT-PCR analysis was performed on the amplified RNA using the LightCycler FastStart DNA MASTERPLUS SYBR Green I Kit and the LightCycler System (Roche Diagnostics GmbH, Mannheim, Germany) according to the manufacturer's instructions. Transcript expression was quantified by normalizing the gene of interest of an endogenous, stably expressed reference gene, ribosomal protein L13a (*RPL13A*). Oligonucleotide primers were designed using Primer Bank (<http://pga.mgh.harvard.edu/>

primerbank/index.html). The Primers for *NOTCH1* are forward: “5’-GAGGCGTGGCAGACTATGC”, and reverse: “5’-CTTGTACTCCGTCAGCGTGA”. The primers for *RPL13A* are forward: “5’-GCCATCGTGGCTAAACAGGTA”, and reverse: “5’-GTTGGTGTTCATCCGCTTGC”.

## References

1. Cheng LH, Hsu CC, Tsai HW, Liao WY, Yang PM, Liao TY, *et al.* ASPM activates Hedgehog and Wnt signaling to promote small cell lung cancer stemness and progression. *Cancer Res* **2023**
2. Xu Z, Zhang Q, Luh F, Jin B, Liu X. Overexpression of the ASPM gene is associated with aggressiveness and poor outcome in bladder cancer. *Oncol Lett* **2019**;17:1865-76
3. Saleh AA, Gohar SF, Hemida AS, Elgharbawy M, Soliman SE. Evaluation of ASPM and TEF Gene Expressions as Potential Biomarkers for Bladder Cancer. *Biochem Genet* **2020**;58:490-507
4. Yang T, Chi Z, Liu G, Hong X, Cao S, Cheng K, *et al.* Screening ANLN and ASPM as bladder urothelial carcinoma-related biomarkers based on weighted gene co-expression network analysis. *Front Genet* **2023**;14:1107625
5. Tang J, Lu M, Cui Q, Zhang D, Kong D, Liao X, *et al.* Overexpression of ASPM, CDC20, and TTK Confer a Poorer Prognosis in Breast Cancer Identified by Gene Co-expression Network Analysis. *Front Oncol* **2019**;9:310
6. Zhang C, Zhang B, Meng D, Ge C. Comprehensive analysis of DNA methylation and gene expression profiles in cholangiocarcinoma. *Cancer Cell Int* **2019**;19:352
7. An X, Huang Y, Zhao P. Expression of ASPM in colonic adenocarcinoma and its clinicopathologic significance. *Int J Clin Exp Pathol* **2017**;10:8968-73
8. Wu J, He Z, Zhu Y, Jiang C, Deng Y, Wei B. ASPM Predicts Poor Clinical Outcome and Promotes Tumorigenesis for Diffuse Large B-cell Lymphoma. *Curr Cancer Drug Targets* **2021**;21:80-9
9. Xu W, Xu J, Wang Z, Jiang Y. Weighted Gene Correlation Network Analysis Identifies Specific Functional Modules and Genes in Esophageal Cancer. *J Oncol* **2021**;2021:8223263
10. Vange P, Bruland T, Beisvag V, Erlandsen SE, Flatberg A, Doseth B, *et al.* Genome-wide analysis of the oxyntic proliferative isthmus zone reveals ASPM as



- a possible gastric stem/progenitor cell marker over-expressed in cancer. *J Pathol* **2015**;237:447-59
11. Hsu CC, Liao WY, Chang KY, Chan TS, Huang PJ, Chiang CT, *et al.* A multi-mode Wnt- and stemness-regulatory module dictated by FOXM1 and ASPM isoform I in gastric cancer. *Gastric Cancer* **2021**;24:624-39
  12. Bikeye SN, Colin C, Marie Y, Vampouille R, Ravassard P, Rousseau A, *et al.* ASPM-associated stem cell proliferation is involved in malignant progression of gliomas and constitutes an attractive therapeutic target. *Cancer Cell Int* **2010**;10:1
  13. Lin SY, Pan HW, Liu SH, Jeng YM, Hu FC, Peng SY, *et al.* ASPM is a novel marker for vascular invasion, early recurrence, and poor prognosis of hepatocellular carcinoma. *Clin Cancer Res* **2008**;14:4814-20
  14. Wang F, Chang Y, Li J, Wang H, Zhou R, Qi J, *et al.* Strong correlation between ASPM gene expression and HCV cirrhosis progression identified by co-expression analysis. *Dig Liver Dis* **2017**;49:70-6
  15. Wu B, Hu C, Kong L. ASPM combined with KIF11 promotes the malignant progression of hepatocellular carcinoma via the Wnt/beta-catenin signaling pathway. *Exp Ther Med* **2021**;22:1154
  16. Liao WY, Hsu CC, Chan TS, Yen CJ, Chen WY, Pan HW, *et al.* Dishevelled 1-Regulated Superpotent Cancer Stem Cells Mediate Wnt Heterogeneity and Tumor Progression in Hepatocellular Carcinoma. *Stem Cell Reports* **2020**;14:462-77
  17. Yuan YJ, Sun Y, Gao R, Yin ZZ, Yuan ZY, Xu LM. Abnormal spindle-like microcephaly-associated protein (ASPM) contributes to the progression of Lung Squamous Cell Carcinoma (LSCC) by regulating CDK4. *J Cancer* **2020**;11:5413-23
  18. Wang J, Liang J, Li H, Han J, Jiang J, Li Y, *et al.* Oncogenic role of abnormal spindle-like microcephaly-associated protein in lung adenocarcinoma. *Int J Oncol* **2021**;58
  19. Lin P, Liang LY, Dong YZ, Ren ZP, Zhao HJ, Li GS. Identification of Abnormal Spindle Microtubule Assembly as a Promising Therapeutic Target for Osteosarcoma. *Orthop Surg* **2020**;12:1963-70
  20. Kouprina N, Pavlicek A, Collins NK, Nakano M, Noskov VN, Ohzeki J, *et al.* The microcephaly ASPM gene is expressed in proliferating tissues and encodes for a mitotic spindle protein. *Hum Mol Genet* **2005**;14:2155-65

21. Wu Y, You Y, Chen L, Liu Y, Liu Y, Lou W, *et al.* Abnormal spindle-like microcephaly-associated protein promotes proliferation by regulating cell cycle in epithelial ovarian cancer. *Gland Surg* **2022**;11:687-701
22. Wang WY, Hsu CC, Wang TY, Li CR, Hou YC, Chu JM, *et al.* A gene expression signature of epithelial tubulogenesis and a role for ASPM in pancreatic tumor progression. *Gastroenterology* **2013**;145:1110-20
23. Tian X, Wang N. Upregulation of ASPM, BUB1B and SPDL1 in tumor tissues predicts poor survival in patients with pancreatic ductal adenocarcinoma. *Oncol Lett* **2020**;19:3307-15
24. Hsu CC, Liao WY, Chan TS, Chen WY, Lee CT, Shan YS, *et al.* The differential distributions of ASPM isoforms and their roles in Wnt signaling, cell cycle progression, and pancreatic cancer prognosis. *J Pathol* **2019**;249:498-508
25. Xie JJ, Zhuo YJ, Zheng Y, Mo RJ, Liu ZZ, Li BW, *et al.* High expression of ASPM correlates with tumor progression and predicts poor outcome in patients with prostate cancer. *Int Urol Nephrol* **2017**;49:817-23
26. Pai VC, Hsu CC, Chan TS, Liao WY, Chuu CP, Chen WY, *et al.* ASPM promotes prostate cancer stemness and progression by augmenting Wnt-Dvl-3-beta-catenin signaling. *Oncogene* **2019**;38:1340-53
27. Wang L, Hu XD, Li SY, Liang XY, Ren L, Lv SX. ASPM facilitates colorectal cancer cells migration and invasion by enhancing beta-catenin expression and nuclear translocation. *Kaohsiung J Med Sci* **2022**;38:129-38
28. Zeng WJ, Cheng Q, Wen ZP, Wang JY, Chen YH, Zhao J, *et al.* Aberrant ASPM expression mediated by transcriptional regulation of FoxM1 promotes the progression of gliomas. *J Cell Mol Med* **2020**;24:9613-26
29. Horvath S, Zhang B, Carlson M, Lu KV, Zhu S, Felciano RM, *et al.* Analysis of oncogenic signaling networks in glioblastoma identifies ASPM as a molecular target. *Proc Natl Acad Sci U S A* **2006**;103:17402-7
30. Chen X, Huang L, Yang Y, Chen S, Sun J, Ma C, *et al.* ASPM promotes glioblastoma growth by regulating G1 restriction point progression and Wnt-beta-catenin signaling. *Aging (Albany NY)* **2020**;12:224-41
31. Zhang H, Yang X, Zhu L, Li Z, Zuo P, Wang P, *et al.* ASPM promotes hepatocellular carcinoma progression by activating Wnt/beta-catenin signaling

- through antagonizing autophagy-mediated Dvl2 degradation. *FEBS Open Bio* **2021**;11:2784-99
32. Xia C, Xu X, Ding Y, Yu C, Qiao J, Liu P. Abnormal spindle-like microcephaly-associated protein enhances cell invasion through Wnt/beta-catenin-dependent regulation of epithelial-mesenchymal transition in non-small cell lung cancer cells. *J Thorac Dis* **2021**;13:2460-74
33. Fang Q, Li Q, Qi Y, Pan Z, Feng T, Xin W. ASPM promotes migration and invasion of anaplastic thyroid carcinoma by stabilizing KIF11. *Cell Biol Int* **2023**
34. Dees C, Tomcik M, Zerr P, Akhmetshina A, Horn A, Palumbo K, *et al.* Notch signalling regulates fibroblast activation and collagen release in systemic sclerosis. *Ann Rheum Dis* **2011**;70:1304-10
